# Supplementary material for: Revised Soil Classification System for Coarse-Fine Mixtures
Source: Atypon-hosted journal article supplement (doi:10.1061/(asce)gt.1943-5606.0001705), 2017-04-17
Supplement: supplemental_data_gt.1943-5606.0001705_park.pdf [file supplemental_data_gt.1943-5606.0001705_park.pdf]

## SUPPLEMENTAL DATA

*ASCE Journal of Geotechnical and Geoenvironmental Engineering*

# Revised Soil Classification System for Coarse-Fine Mixtures

Junghee Park and J. Carlos Santamarina

**DOI:** 10.1061/(ASCE)GT.1943-5606.0001705

© ASCE 2017

[www.ascelibrary.org](http://www.ascelibrary.org)

**Guidelines**Input values in **cells highlighted in yellow****Revised Soil Classification System RSCS****1. Grain Size Fractions**Input: Gravel fraction  $F_G$ Input: Sand fraction  $F_S$ 

| Gravel [%] | Sand [%]  | Fines [%] |
|------------|-----------|-----------|
| <b>3</b>   | <b>76</b> | <b>21</b> |

Plot the point that corresponds to the soil under consideration

**2. Gravel and sand: maximum and minimum void ratios**Input: Roundness  $R$  and uniformity  $C_u$  for gavelInput: Roundness  $R$  and uniformity  $C_u$  for sand

| Gravel     |          | Sand       |          |
|------------|----------|------------|----------|
| R          | $C_u$    | R          | $C_u$    |
| <b>0.3</b> | <b>2</b> | <b>0.3</b> | <b>2</b> |

| $e_G^{\max}$ | $e_G^{\min}$ | $e_S^{\max}$ | $e_S^{\min}$ |
|--------------|--------------|--------------|--------------|
| <b>0.81</b>  | <b>0.45</b>  | <b>0.81</b>  | <b>0.45</b>  |

**3. Fines: Estimated reference void ratios**

Input: Liquid limit of fines (passing sieve #200)

| Fines     |                   |                      |                     |
|-----------|-------------------|----------------------|---------------------|
| LL [%]    | $e_F^{\text{LL}}$ | $e_F^{10\text{kPa}}$ | $e_F^{1\text{MPa}}$ |
| <b>63</b> | <b>1.67</b>       | <b>1.67</b>          | <b>0.90</b>         |

Fig. S1. Needed input values—Gravel fraction  $F_G$  and sand fraction  $F_S$ . Roundness  $R$  and coefficient of uniformity  $C_u$  for both gavel and sand, and liquid limit of fines passing sieve No. 200.

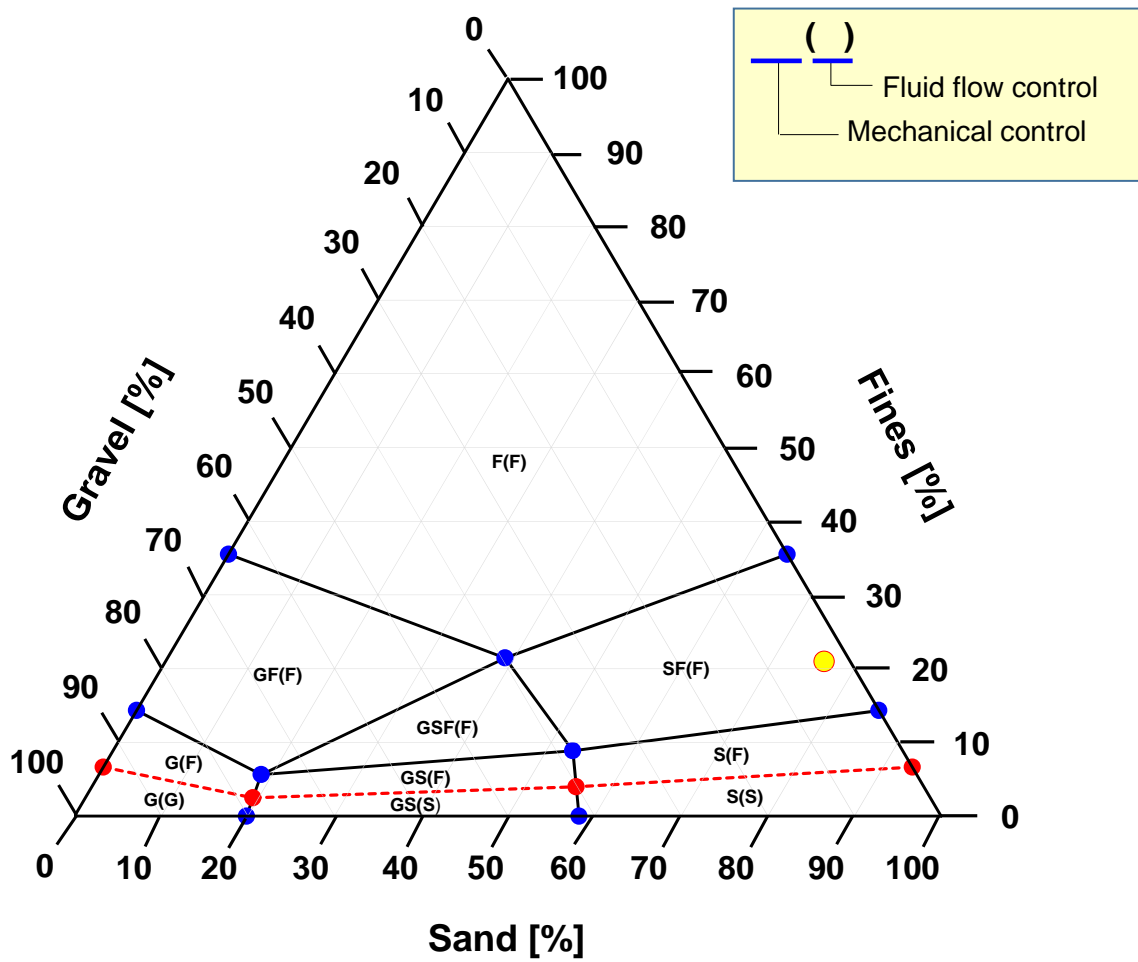

Fig. S2. Triangular textural chart—Soil classification boundaries.
